# Supplementary material for: Uropathogenic Escherichia coli Releases Extracellular Vesicles That Are Associated with RNA
Source: PubMed Central journal article supplement (PMC4976981; doi:10.1371/journal.pone.0160440), 2016-08-08
Supplement: pone.0160440.s001.pdf [file pone.0160440.s001.pdf]

# TEM: UPEC RF MV preparation

Magnification 1

Magnification 2

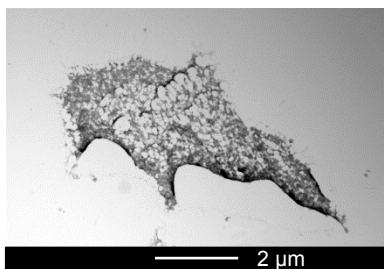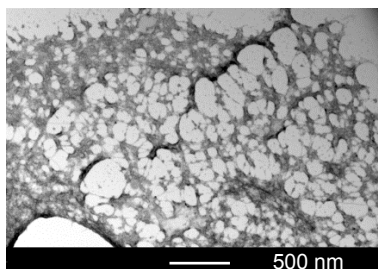

RF1

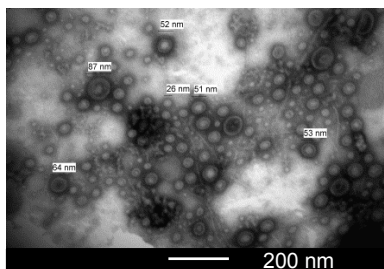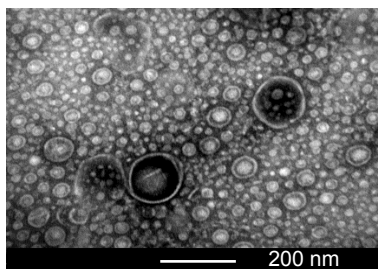

RF2

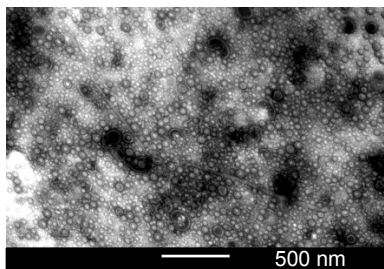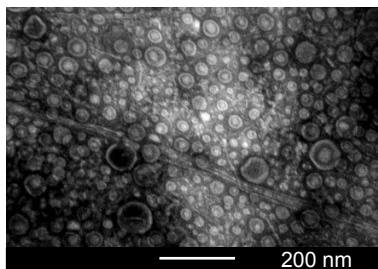

RF3

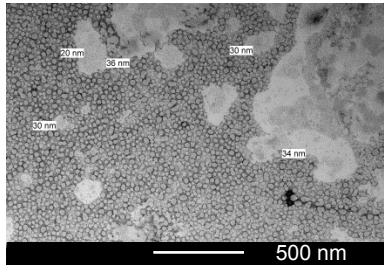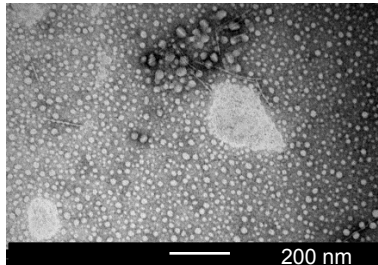

RF4

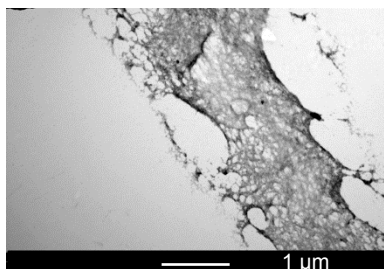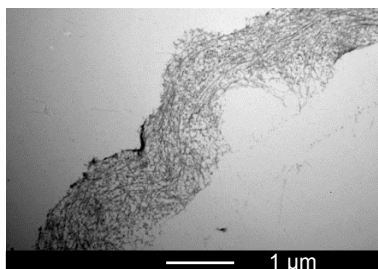

RF5

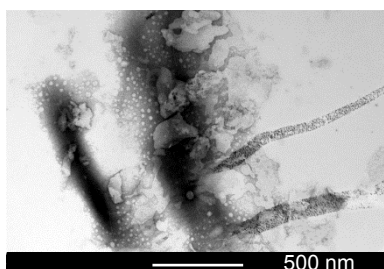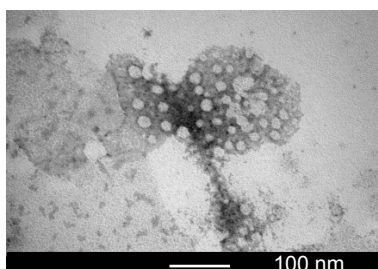

RF6
